# Supplementary material for: Non-Alcoholic Fatty Liver Disease with Sarcopenia and Carotid Plaque Progression Risk in Patients with Type 2 Diabetes Mellitus
Source: PubMed Central journal article supplement — Diabetes Metab J. 2023 Jan 19;47(2):232–41. doi: 10.4093/dmj.2021.0355 (PMC10040622; doi:10.4093/dmj.2021.0355), 2023-01-19
Supplement: dmj-2021-0355-Supplementary-Table-1.pdf [file dmj-2021-0355-Supplementary-Table-1.pdf]

**Supplementary Table 1.** Group classification according to the status of NAFLD and sarcopenia at baseline and after 6 to 8 years ( $n=271$ )

| Study population                  | No NAFLD or sarcopenia | Only NAFLD | Only sarcopenia | NAFLD with sarcopenia | <i>P</i> value |
|-----------------------------------|------------------------|------------|-----------------|-----------------------|----------------|
| Number                            | 108                    | 124        | 15              | 24                    |                |
| After 6–8 years                   |                        |            |                 |                       | <0.001         |
| No NAFLD or sarcopenia ( $n=94$ ) | 72 (66.7)              | 20 (16.1)  | 1 (6.7)         | 1 (4.2)               |                |
| Only NAFLD ( $n=131$ )            | 31 (28.7)              | 94 (75.8)  | 1 (6.7)         | 5 (20.8)              |                |
| Only sarcopenia ( $n=4$ )         | 1 (0.9)                | 0          | 3 (20.0)        | 0                     |                |
| NAFLD with sarcopenia ( $n=42$ )  | 4 (3.7)                | 10 (8.1)   | 10 (66.7)       | 18 (75.0)             |                |

Values are presented as number (%). Levels of significance:  $P < 0.001$  (chi-square test).  
NAFLD, non-alcoholic fatty liver disease.
